# Supplementary material for: Synaptic dysfunction and glial activation markers throughout aging and early neurodegeneration: a longitudinal CSF biomarker-based study
Source: Research Square preprint supplement (doi:10.21203/rs.3.rs-6982788/v1), 2025-07-18
Supplement: Supplementary file 1 [file 1a5261da388d57da4a49dbd9.docx]

**Supplementary material**

Supplementary figure 1. Partial correlations adjusted by age between biomarkers at baseline


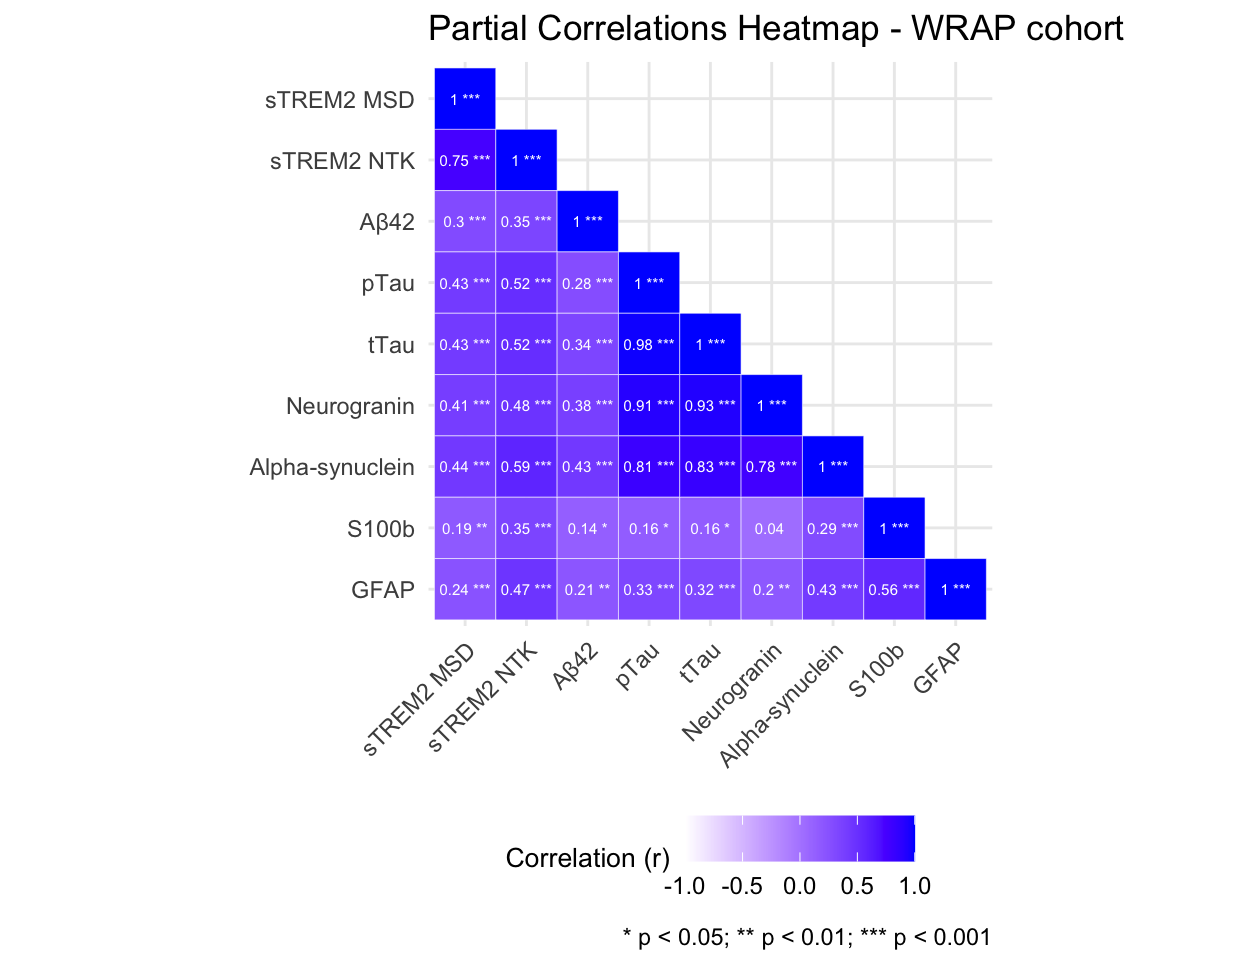


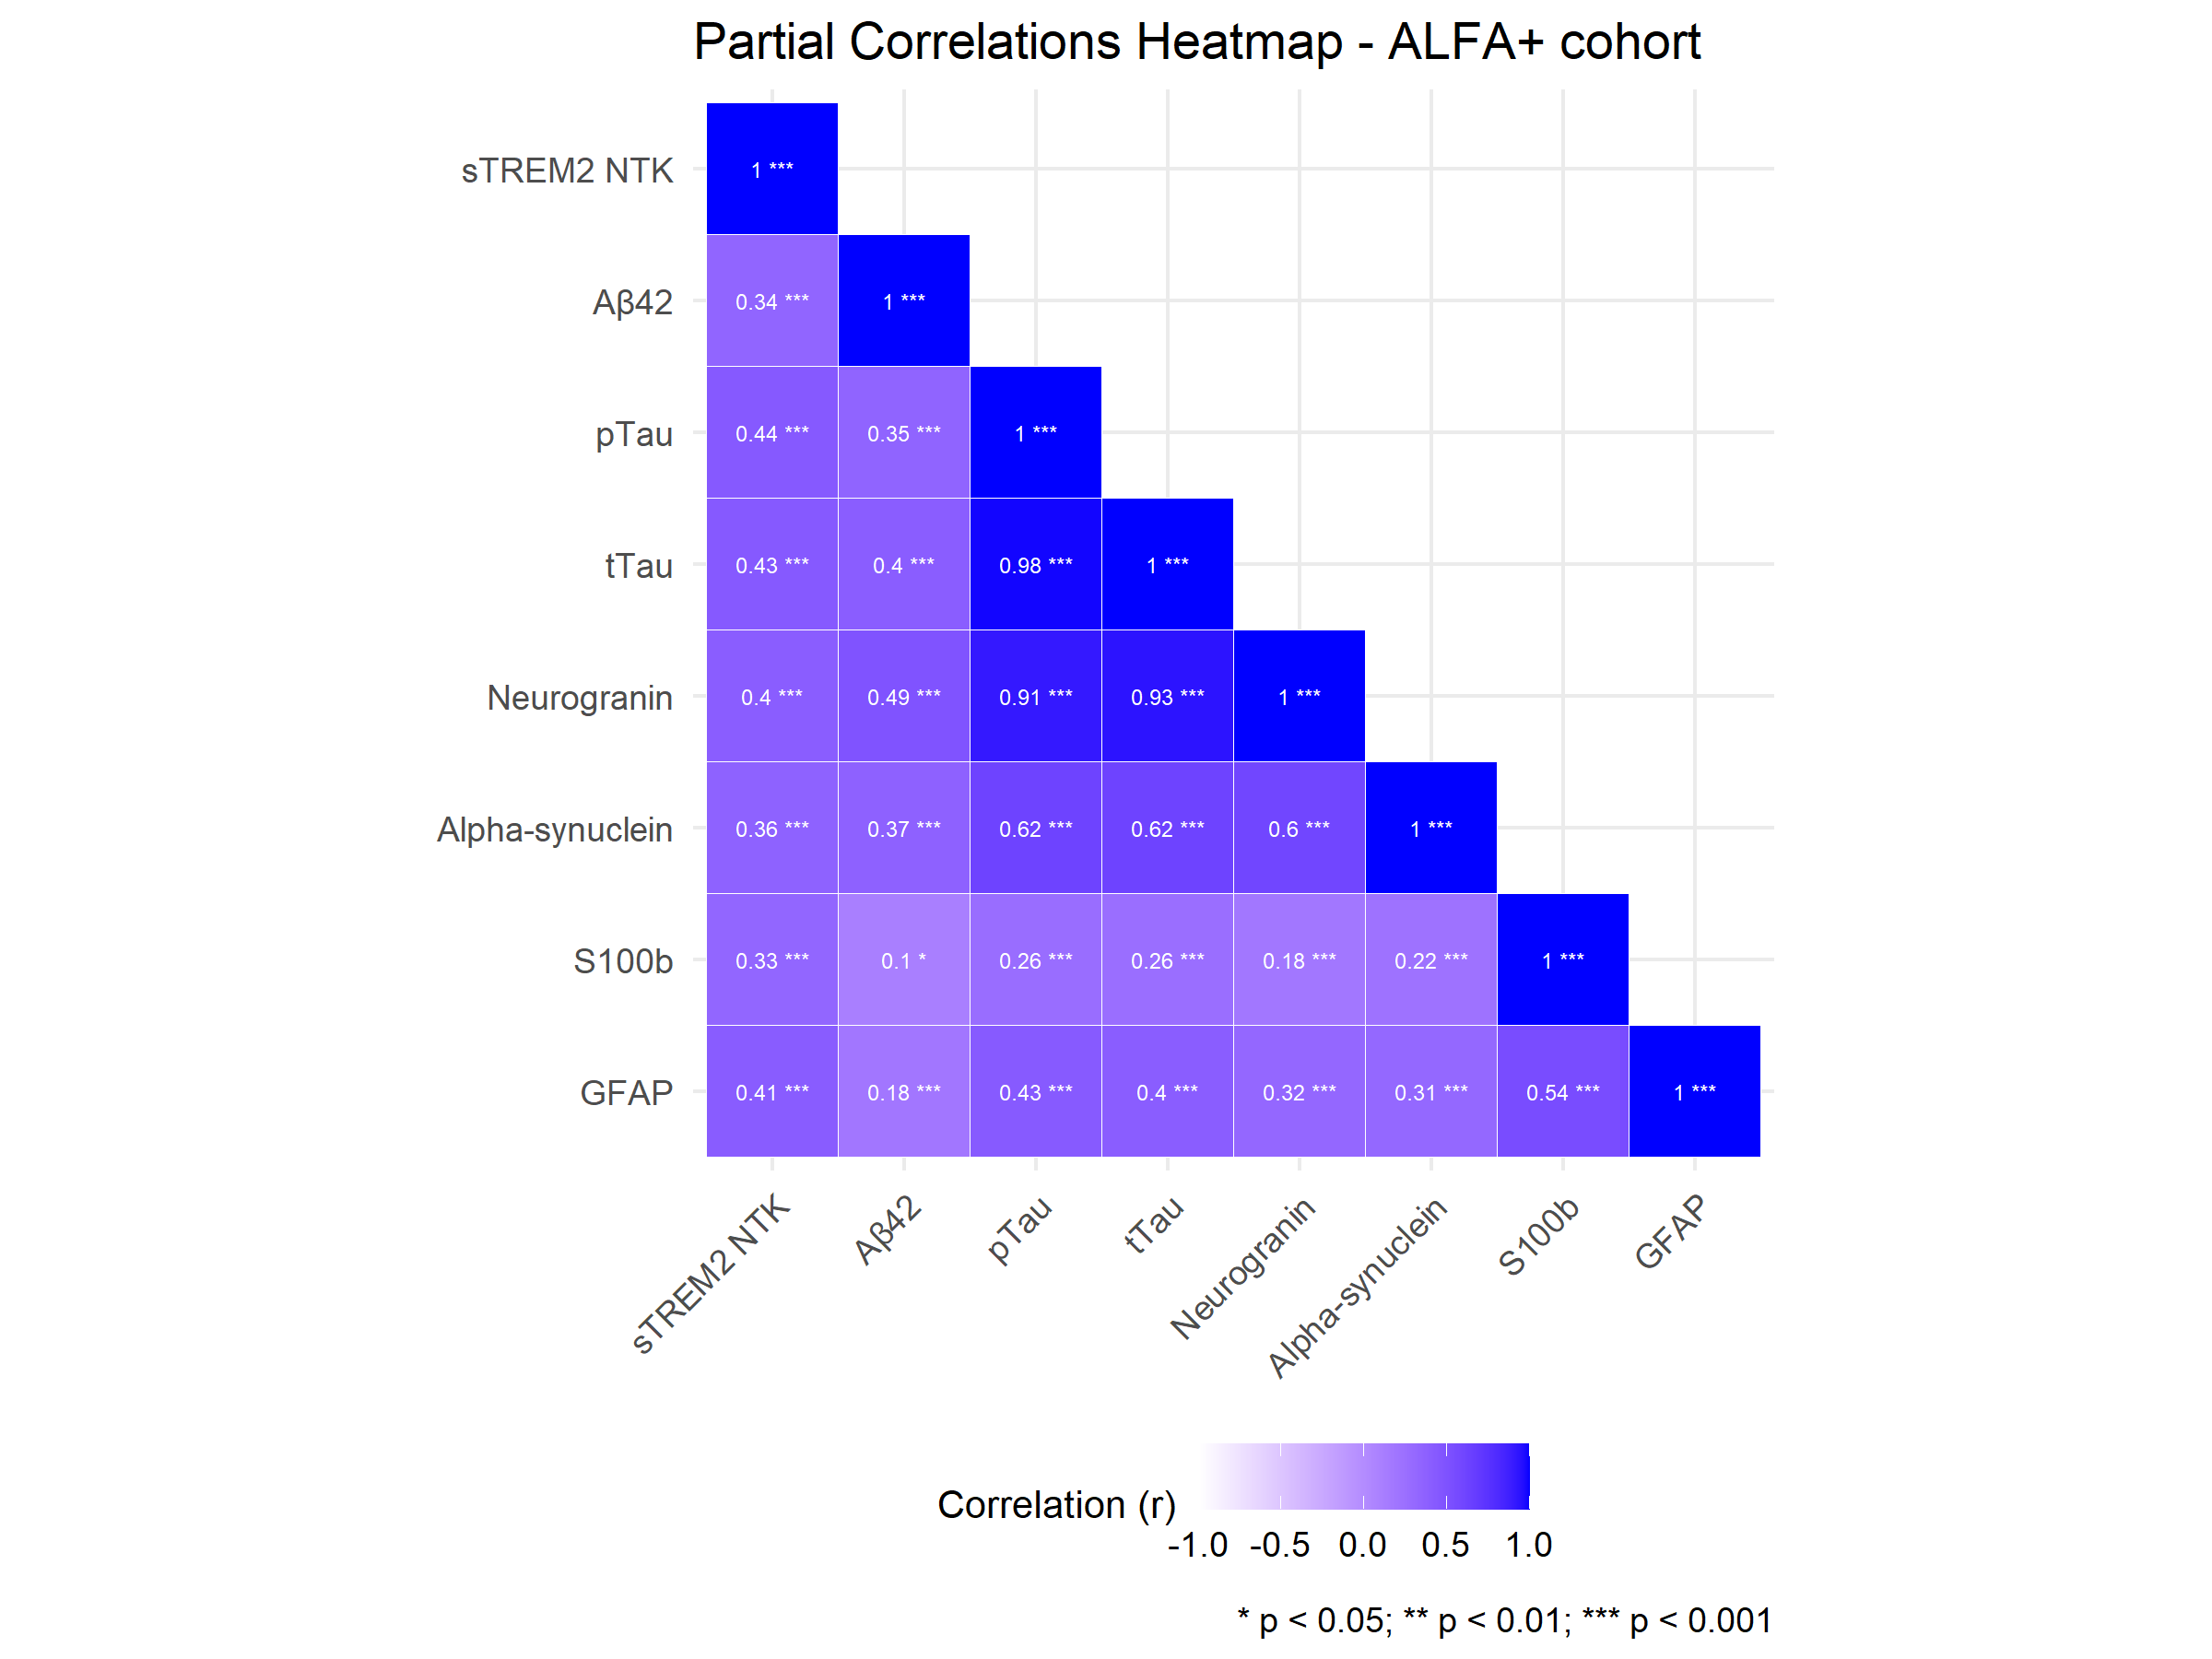


|  | Total sample | | < Aß42/Aß40 median | | > Aß42/Aß40 median | | A + | | A - | | < P-tau median | | > P-tau median | | T- | | T+ | | Apoe-e4 carrier | | Apoe-e4 non-carrier | |
| --- | --- | --- | --- | --- | --- | --- | --- | --- | --- | --- | --- | --- | --- | --- | --- | --- | --- | --- | --- | --- | --- | --- |
| n=239 | | n= 119 | | n=120 | | n= 46 | | n=193 | | n= 119 | | n=120 | | n=214 | | n=25 | | n=88 | | n=151 | |
|  | ß | *p-value* | ß | *p-value* | ß | *p-value* | ß | *p-value* | ß | *p-value* | ß | *p-value* | ß | *p-value* | ß | *p-value* | ß | *p-value* | ß | *p-value* | ß | *p-value* |
| Neurogranin | | | | | | | | | | | | | | | | | | | | | | |
| Model 1 | **0.37** | ***0.000*** | 0.38 | ***0.00*** | **0.35** | ***0.00*** | **0.40** | ***0.01*** | **0.39** | ***0.00*** | **0.25** | ***0.03*** | **0.27** | ***0.03*** | **0.39** | ***0.00*** | 0.49 | *0.29* | **0.39** | ***0.00*** | **0.36** | ***0.00*** |
| Model 2 | -0.04 | *0.78* | 0.13 | *0.48* | -0.37 | *0.08* | -0.05 | *0.88* | -0.05 | *0.73* | -0.04 | *0.81* | -0.06 | *0.77* | -0.07 | *0.61* | 0.32 | *0.59* | 0.10 | *0.59* | -0.16 | *0.39* |
| Alfa-synuclein | | | | | | | | | | | | | | | | | | | | | | |
| Model 1 | **0.37** | ***0.00*** | 0.37 | ***0.00*** | **0.39** | ***0.00*** | **0.48** | ***0.00*** | **0.37** | ***0.00*** | **0.30** | ***0.00*** | **0.29** | ***0.00*** | **0.37** | ***0.00*** | **0.79** | ***0.01*** | **0.40** | ***0.00*** | **0.36** | ***0.00*** |
| Model 2 | 0.16 | *0.09* | 0.15 | *0.25* | 0.20 | *0.14* | 0.37 | *0.08* | 0.12 | *0.26* | 0.11 | *0.42* | 0.19 | *0.141* | 0.11 | *0.25* | **0.83** | ***0.02*** | 0.20 | *0.19* | 0.14 | *0.24* |
| S100b | | | | | | | | | | | | | | | | | | | | | | |
| Model 1 | **0.28** | ***0.002*** | **0.41** | ***0.001*** | 0.15 | *0.26* | 0.29 | *0.21* | **0.28** | ***0.00*** | 0.11 | *0.33* | **0.32** | ***0.01*** | **0.22** | ***0.02*** | **0.74** | ***0.03*** | **0.28** | ***0.03*** | 0.24 | *0.06* |
| Model 2 | 0.16 | *0.06* | **0.26** | ***0.03*** | 0.06 | *0.61* | 0.23 | *0.27* | 0.15 | *0.10* | 0.05 | *0.64* | **0.28** | ***0.01*** | 0.10 | *0.23* | 0.70 | *0.07* | 0.18 | *0.12* | 0.11 | *0.37* |
| GFAP | | | | | | | | | | | | | | | | | | | | | | |
| Model 1 | **0.26** | ***0.0001*** | **0.21** | ***0.03*** | **0.31** | ***0.00*** | 0.27 | *0.17* | **0.26** | ***0.00*** | 0.08 | *0.36* | 0.12 | *0.18* | **0.23** | ***0.00*** | 0.40 | *0.22* | 0.20 | *0.05* | **0.31** | ***0.00*** |
| Model 2 | 0.09 | *0.15* | 0.04 | *0.67* | 0.16 | *0.07* | 0.14 | *0.47* | 0.10 | *0.16* | 0.11 | *0.28* | 0.08 | *0.36* | 0.09 | *0.18* | 0.32 | *0.42* | 0.07 | *0.46* | 0.13 | *0.14* |

**Supplementary table 1. WRAP cohort. Beta-coefficients and p-values for cross-sectional associations between synaptic biomarkers and soluble cleaved soluble TREM2 (cSTREM2) in linear regression models**

| **Statistically significant (p<0.05)** |
| --- |
| *Model 1=adjusted by age and sex. Model 2=adjusted by age, sex,* Aβ42 *and PTAU* |
| Aβ42/Aβ40 *median =* 0.067. The cut-off for amyloid (A) positivity according to the Aβ42/Aβ40 ratio is < 0.046 |
| P-tau median = 15.94 pg/mL. The cut-off for tau (T) positivity according to P-tau is > 24.8 pg/mL |
| WRAP = Wisconsin Registry for Alzheimer prevention cohort |

**Supplementary table 2. WRAP cohort: Beta coefficients for the interaction between baseline biomarkers and time. predicting longitudinal change in csTREM2**

|  | Total sample | | < Aß42/Aß40 median | | > Aß42/Aß40 median | | A + | | A - | | < P-tau median | | > P-tau median | | T- | | T+ | | Apoe-e4 carriers | | Apoe-e4 non-carriers | |
| --- | --- | --- | --- | --- | --- | --- | --- | --- | --- | --- | --- | --- | --- | --- | --- | --- | --- | --- | --- | --- | --- | --- |
| n=116 | | n= 61 | | n=55 | | n= 28 | | n=88 | | n= 53 | | n=63 | | n=105 | | n=11 | | n=46 | | n=71 | |
|  | ß | *p-value* | ß | *p-value* | ß | *p-value* | ß | *p-value* | ß | *p-value* | ß | *p-value* | ß | *p-value* | ß | *p-value* | ß | *p-value* | ß | *p-value* | ß | *p-value* |
| Neurogranin | | | | | | | | | | | | | | | | | | | | | | |
| Model 1 | **-0.041** | ***0.000*** | **-0.039** | ***0.002*** | **-0.045** | ***0.010*** | **-0.057** | ***0.004*** | **-0.038** | ***0.003*** | **-0.052** | ***0.011*** | **-0.052** | ***0.011*** | **-0.040** | ***0.001*** | -0.092 | *0.078* | **-0.038** | ***0.005*** | **-0.044** | ***0.005*** |
| Model 2 | **-0.041** | ***0.000*** | **-0.039** | ***0.002*** | **-0.046** | ***0.008*** | **-0.058** | ***0.003*** | **-0.038** | ***0.002*** | **-0.052** | ***0.011*** | **-0.052** | ***0.010*** | **-0.041** | ***0.001*** | -0.093 | *0.076* | **-0.039** | ***0.005*** | **-0.044** | ***0.005*** |
| Alfa-synuclein | | | | | | | | | | | | | | | | | | | | | | |
| Model 1 | **-0.026** | ***0.003*** | **-0.023** | ***0.049*** | **-0.031** | ***0.019*** | -0.035 | *0.066* | **-0.025** | ***0.012*** | -0.028 | *0.119* | -0.024 | *0.100* | **-0.025** | ***0.010*** | -0.018 | *0.688* | -0.021 | *0.089* | **-0.030** | ***0.015*** |
| Model 2 | **-0.026** | ***0.002*** | -0.022 | *0.051* | **-0.031** | ***0.019*** | -0.035 | *0.066* | **-0.026** | ***0.011*** | -0.028 | *0.117* | -0.024 | *0.098* | **-0.025** | ***0.009*** | -0.018 | *0.689* | -0.021 | *0.083* | **-0.030** | ***0.015*** |
| S100b | | | | | | | | | | | | | | | | | | | | | | |
| Model 1 | 0.016 | *0.317* | 0.014 | *0.419* | 0.019 | *0.520* | 0.052 | *0.052* | 0.001 | *0.976* | 0.013 | *0.629* | 0.042 | *0.050* | 0.017 | *0.318* | 0.017 | *0.651* | 0.008 | *0.697* | 0.029 | *0.268* |
| Model 2 | 0.015 | *0.338* | 0.014 | *0.422* | 0.016 | *0.580* | **0.052** | ***0.050*** | -0.001 | *0.958* | 0.012 | *0.638* | **0.042** | ***0.049*** | 0.015 | *0.366* | 0.017 | *0.637* | 0.007 | *0.704* | 0.028 | *0.286* |
| GFAP | | | | | | | | | | | | | | | | | | | | | | |
| Model 1 | -0.003 | *0.770* | -0.002 | *0.858* | -0.005 | *0.766* | 0.045 | *0.046* | -0.015 | *0.243* | -0.002 | *0.932* | 0.016 | *0.300* | -0.002 | *0.863* | 0.037 | *0.240* | -0.003 | *0.832* | -0.003 | *0.841* |
| Model 2 | -0.004 | *0.731* | -0.002 | *0.871* | -0.007 | *0.682* | 0.046 | *0.044* | -0.015 | *0.220* | -0.002 | *0.904* | 0.016 | *0.302* | -0.003 | *0.802* | 0.037 | *0.232* | -0.004 | *0.802* | -0.003 | *0.831* |

| **Statistically significant (p<0.05)** |
| --- |
| *Model 1=adjusted by age and sex. Model 2=adjusted by age, sex,* Aβ42 *and p-tau* |

.

**Supplementary table 3. ALFA+ Cohort. Beta-coefficients and p-values for cross-sectional associations between synaptic biomarkers and soluble cleaved soluble TREM2 (cSTREM2) in linear regression models**

|  | Total sample | | < Aß42/Aß40 median | | > Aß42/Aß40 median | | A + | | A - | | < P-tau median | | > P-tau median | | T- | | T+ | | Apoe-e4 carriers | | Apoe-e4 non-carriers | |
| --- | --- | --- | --- | --- | --- | --- | --- | --- | --- | --- | --- | --- | --- | --- | --- | --- | --- | --- | --- | --- | --- | --- |
| n=239 | | n= 119 | | n=120 | | n= 46 | | n=193 | | n= 119 | | n=120 | | n=214 | | n=25 | | n=46 | | n=71 | |
|  | ß | *p-value* | ß | *p-value* | ß | *p-value* | ß | *p-value* | ß | *p-value* | ß | *p-value* | ß | *p-value* | ß | *p-value* | ß | *p-value* | ß | *p-value* | ß | *p-value* |
| Neurogranin | | | | | | | | | | | | | | | | | | | | | | |
| Model 1 | **0.31** | ***0.00*** | **0.27** | ***0.00*** | **0.36** | ***0.00*** | **0.30** | ***0.00*** | **0.34** | ***0.00*** | **0.20** | ***0.01*** | **0.31** | ***0.00*** | **0.28** | **0.00** | 0.01 | 0.95 | **0.25** | **0.00** | **0.36** | **0.00** |
| Model 2 | **-0.21** | ***0.04*** | -0.13 | *0.43* | -0.23 | *0.06* | -0.26 | *0.16* | -0.14 | *0.25* | **-0.37** | ***0.00*** | -0.03 | *0.85* | **-0.22** | **0.04** | -0.20 | 0.57 | -0.05 | 0.76 | **-0.32** | **0.01** |
| Alfa-synuclein | | | | | | | | | | | | | | | | | | | | | | |
| Model 1 | **0.21** | ***0.00*** | **0.26** | ***0.00*** | **0.16** | ***0.00*** | **0.30** | ***0.00*** | **0.17** | ***0.00*** | **0.12** | ***0.00*** | **0.19** | ***0.00*** | **0.18** | ***0.00*** | 0.11 | *0.19* | **0.15** | ***0.00*** | ***0.25*** | ***0.00*** |
| Model 2 | 0.07 | *0.06* | **0.15** | ***0.02*** | 0.02 | *0.53* | **0.20** | ***0.01*** | 0.03 | *0.45* | 0.04 | *0.28* | 0.10 | *0.11* | 0.06 | *0.15* | 0.15 | *0.15* | *0.06* | *0.34* | ***0.08*** | ***0.05*** |
| S100b | | | | | | | | | | | | | | | | | | | | | | |
| Model 1 | **0.44** | ***0.00*** | **0.42** | ***0.00*** | **0.49** | ***0.00*** | **0.59** | ***0.00*** | **0.34** | ***0.00*** | **0.33** | ***0.00*** | **0.33** | ***0.00*** | **0.39** | ***0.00*** | 0.27 | *0.15* | ***0.35*** | ***0.00*** | ***0.63*** | ***0.00*** |
| Model 2 | **0.28** | ***0.00*** | **0.30** | ***0.00*** | **0.28** | ***0.00*** | **0.51** | ***0.00*** | 0.13 | *0.11* | **0.25** | ***0.00*** | **0.29** | ***0.00*** | **0.28** | ***0.00*** | 0.26 | *0.16* | ***0.26*** | ***0.01*** | ***0.34*** | ***0.00*** |
| GFAP | | | | | | | | | | | | | | | | | | | | | | |
| Model 1 | **0.40** | **0.00** | **0.34** | **0.00** | **0.44** | **0.00** | **0.44** | **0.00** | **0.27** | **0.01** | **0.30** | **0.00** | **0.30** | **0.00** | **0.36** | **0.00** | 0.11 | 0.51 | **0.37** | **0.00** | **0.26** | **0.00** |
| Model 2 | **0.24** | **0.00** | 0.16 | 0.07 | **0.29** | **0.00** | **0.38** | **0.00** | **0.22** | **0.00** | **0.23** | **0.00** | **0.26** | **0.00** | **0.25** | **0.00** | 0.17 | 0.33 | **0.43** | **0.00** | **0.23** | **0.00** |

| **Statistically significant (p<0.05)** |
| --- |
| *Model 1=adjusted by age and sex. Model 2=adjusted by age, sex,* Aβ42 *and PTAU* |
| Aβ42/Aβ40 *median =* 0.08057. The cut-off for amyloid (A) positivity according to the Aβ42/Aβ40 ratio is < 0.071. |
| P-tau median = 14.75 pg/mL. The cut-off for tau (T) positivity according to P-tau is > 24 pg/mL |
| ALFA = Alzheimer’s and Families cohort |

**Supplementary table 4. ALFA+ cohort: Beta coefficients for the interaction between baseline biomarkers and time. predicting longitudinal change in csTREM2**

|  | Total sample | | < Aß42/Aß40 median | | > Aß42/Aß40 median | | A + | | A - | | < P-tau median | | > P-tau median | | T- | | T+ | | Apoe-e4 carriers | | Apoe-e4 non-carriers | |
| --- | --- | --- | --- | --- | --- | --- | --- | --- | --- | --- | --- | --- | --- | --- | --- | --- | --- | --- | --- | --- | --- | --- |
| n=277 | | n= 135 | | n=142 | | n= 92 | | n=185 | | n= 115 | | n=129 | | n=212 | | n=32 | | n=152 | | n=125 | |
|  | ß | *p-value* | ß | *p-value* | ß | *p-value* | ß | *p-value* | ß | *p-value* | ß | *p-value* | ß | *p-value* | ß | *p-value* | ß | *p-value* | ß | *p-value* | ß | *p-value* |
| Neurogranin | | | | | | | | | | | | | | | | | | | | | | |
| Model 1 | -0.006 | *0.222* | 0.001 | *0.878* | **-0.015** | ***0.018*** | 0.007 | *0.476* | **-0.016** | ***0.008*** | -0.012 | *0.280* | 0.006 | *0.494* | -0.005 | *0.397* | 0.021 | *0.443* | -0.008 | *0.227* | -0.004 | *0.615* |
| Model 2 | -0.002 | *0.744* | 0.007 | *0.339* | -0.011 | *0.105* | -0.001 | *0.875* | -0.005 | *0.363* | -0.012 | *0.287* | 0.007 | *0.491* | -0.005 | *0.398* | 0.022 | *0.436* | -0.005 | *0.466* | 0.003 | *0.656* |
| Alfa-synuclein | | | | | | | | | | | | | | | | | | | | | | |
| Model 1 | -0.007 | *0.091* | -0.004 | *0.596* | **-0.011** | ***0.053*** | 0.002 | *0.776* | **-0.013** | ***0.010*** | -0.004 | *0.466* | 0.001 | *0.865* | -0.007 | *0.182* | 0.011 | *0.313* | **-0.013** | ***0.042*** | -0.003 | *0.619* |
| Model 2 | -0.002 | *0.630* | 0.007 | *0.240* | **-0.011** | ***0.048*** | 0.004 | *0.559* | -0.006 | *0.191* | -0.004 | *0.483* | 0.001 | *0.868* | -0.006 | *0.190* | 0.011 | *0.310* | -0.005 | *0.466* | 0.000 | *0.966* |
| S100b | | | | | | | | | | | | | | | | | | | | | | |
| Model 1 | 0.008 | *0.403* | 0.013 | *0.360* | -0.001 | *0.948* | 0.020 | *0.236* | 0.000 | *0.976* | 0.023 | *0.090* | -0.001 | *0.950* | 0.006 | *0.518* | 0.016 | *0.519* | 0.012 | *0.280* | 0.000 | *0.997* |
| Model 2 | 0.007 | *0.376* | 0.010 | *0.415* | 0.003 | *0.793* | 0.018 | *0.204* | -0.001 | *0.942* | 0.023 | *0.091* | -0.001 | *0.936* | 0.006 | *0.523* | 0.016 | *0.532* | 0.010 | *0.397* | 0.003 | *0.797* |
| GFAP | | | | | | | | | | | | | | | | | | | | | | |
| Model 1 | -0.001 | *0.832* | 0.000 | *0.961* | -0.002 | *0.773* | 0.003 | *0.788* | -0.005 | *0.490* | 0.005 | *0.563* | -0.003 | *0.745* | -0.002 | *0.734* | 0.013 | *0.488* | -0.005 | *0.595* | -0.002 | *0.831* |
| Model 2 | 0.000 | *0.978* | 0.001 | *0.921* | -0.001 | *0.885* | -0.002 | *0.827* | -0.001 | *0.891* | 0.005 | *0.558* | -0.003 | *0.745* | -0.002 | *0.736* | 0.013 | *0.493* | 0.001 | *0.895* | 0.002 | *0.820* |

| **Statistically significant (p<0.05)** |
| --- |
| *Model 1=adjusted by age and sex. Model 2=adjusted by age, sex,* Aβ42 *and p-tau* |
